# Supplementary material
Source: MDPI journal article supplement (https://www.mdpi.com/2624-5175/4/4/41)
Supplement: s1 [file s1]

## Supplemental S1. The Questionnaire

ID#: \_\_\_\_\_ Date: \_\_\_\_\_ Height: \_\_\_\_\_ cm Weight: \_\_\_\_\_ kg

The following questions ask your sleep and life habits. Please answer the questions in the second-half of the actigraphic measurement period. Please answer all the, and questions with looking back over the previous month.

1. How many times during the night (during sleep) do you wake up?  
(1) None (2) About \_\_\_ times per night
2. How deep is your usual sleep?  
(1) Sound (2) Generally sound (3) Neither (4) Generally poor (5) Poor
3. About how many times do you go to the toilet during the night?  
(1) Do not go (2) Go about \_\_\_ times per night
4. Do you awake too early in the morning?  
(1) Frequently (2) Sometimes (3) Occasionally (4) Never
5. Are you told you are groggy at night?  
(1) Frequently (2) Sometimes (3) Occasionally (4) Never
6. When sleeping at night are you struck with a feeling of being tied down (Kanashibari)?  
(1) Frequently (2) Sometimes (3) Occasionally (4) Never
7. Do you have vivid, frightening dreams as you are about to fall asleep at night?  
(1) Frequently (2) Sometimes (3) Occasionally (4) Never
8. Are you told your legs twitch or kick during the night, or do your legs become restless and uncomfortable when you get sleepy?  
(1) Frequently (2) Sometimes (3) Occasionally (4) Never
9. Do you take sleeping medicine or tranquilizers to sleep?  
(1) Frequently (2) Sometimes (3) Occasionally (4) Never
10. Do you snore?  
(1) Frequently (2) Sometimes (3) Occasionally (4) Never
11. Are you told that you stop breathing during your sleep?  
(1) Frequently (2) Sometimes (3) Occasionally (4) Never
12. Can you get out of bed when it is time to get up?  
(1) I can get up easily (2) I can get up with a little effort  
(3) I can get up with considerable effort (4) I cannot get up no matter how hard I try

13. How long does it normally take you to fall asleep after getting into bed?  
Generally about \_\_\_minutes
14. How long does it take you get up after waking in the morning?  
Generally about \_\_\_minutes
15. How long do you watch TV?  
On weekdays: (1) None (2) About \_\_\_minutes per day  
On weekends: (1) None (2) About \_\_\_minutes per day
16. How long do you study? (Only for the high school students)  
On weekdays: (1) None (2) About \_\_\_minutes per day  
On weekends: (1) None (2) About \_\_\_minutes per day
17. How long do you use electronic devices such as smartphones or electronic games?  
On weekdays: (1) None (2) About \_\_\_minutes per day  
On weekends: (1) None (2) About \_\_\_minutes per day
18. Do you use electronic devices within 30 min before bedtime?  
(1) Almost every day (2) Several times/week (3) Rarely (4) Never
19. Do you perceive sleep loss?  
(1) Almost every day (2) Several times/week (3) Rarely (4) Never
20. If you perceive sleep loss, check all cause(s) show below.
- ☐ Using electronic devices such as a smartphone;
  - ☐ Watching TV;
  - ☐ Insomnia or stress;
  - ☐ No specific cause;
  - ☐ Long commuting time to the workplace/school;
  - ☐ Others;
- Only for mothers:
- ☐ Domestic affairs;
  - ☐ Family-related issues;
  - ☐ Job-related issues;
- Only for high school students:
- ☐ Homework given by the high school;
  - ☐ Extracurricular activity
21. Do you doze off and/or take a nap?  
(1) Frequently (2) Sometimes (3) Occasionally (4) Never
22. Do you take a nap after returning home from school? (Only for the high school students)  
(1) Almost every day (2) Several times/week (3) Rarely (4) Never
